# Supplementary material
Source: publisher site journal article supplement (https://www.degruyterbrill.com/publication/isbn/9783486711172/downloadAsset/9783486711172_Leseprobe.pdf)
Supplement: Supplementary file 1 [file 9783486711172_Leseprobe.pdf]

# 1

## Tourismus – ein blinder Fleck der Politologie

**D**ie Grundlagen des Tourismus sind politischer Natur. Ohne die Garantie von Freizügigkeit und Mobilität, die in liberalen Staaten zu den Grundrechten der Bürger gehören, ist der Tourismus so wenig möglich wie ohne eine entsprechende wirtschaftliche Grundlage. Durch das Fehlen entsprechender Rahmenbedingungen, vor allem von Freiräumen für die Entfaltung unternehmerischer Aktivitäten, von öffentlicher Infrastruktur und von tragfähigen Systemen sozialer Sicherung, wird die Entwicklung einer auch auf Wohlstand gegründeten Gesellschaft im besten Falle behindert, meistens jedoch unmöglich gemacht. Das gilt für private wie für geschäftlich veranlaßte Reisen in gleichem Maße. Wer bereits Probleme hat, seine Alltagsbedürfnisse zu befriedigen, wird auch kaum über die materiellen Möglichkeiten verfügen, Reisen einfach zu seinem Vergnügen zu unternehmen. Geschäftsreisen, die ja ebenfalls dem Tourismus zugerechnet werden müssen, würden unter solchen Bedingungen wenig Sinn haben: Wo privatwirtschaftliche Initiativen eingeengt oder sogar unterdrückt werden, ist auch wenig Handel zu erwarten und je weniger der Handel mit Gütern und Dienstleistungen entwickelt ist, desto geringer wird auch die Notwendigkeit

des Reisens für die Anknüpfung neuer oder die Pflege bereits bestehender Geschäftsbeziehungen. In freien Marktwirtschaften sind Geschäftsreisen deshalb „Teil des Inputs im Produktionsprozeß“ (Bochert 2001, S. 9) und von daher auch Gegenstand von Politik, die ein Interesse daran hat, daß Wirtschaft und Gesellschaft positive Rahmenbedingungen für die Entfaltung ihrer Geschäftstätigkeiten vorfinden.

Materieller Wohlstand und die Akzeptanz bzw. Legitimität politischer Systeme sind sehr eng miteinander verknüpft. Bürger messen die Leistungen der Politik weniger an weltanschaulichen Idealen und entsprechenden Systemen als an den eigenen Lebensbedingungen. Sie schauen dabei zwar auch auf die gegenwärtige Situation, mehr aber noch in die Zukunft. Das ist ein Phänomen, das wir auch an den Börsen beobachten können: Der Wert von Unternehmen bemißt sich hier nicht so sehr an ihren Geschäftsergebnissen wie an den wahrgenommenen oder besonders den erhofften Perspektiven, die mit ihren Aktien verbunden werden.

Damit läßt sich weitgehend auch die „Ironie der Geschichte“ erklären, „daß der von innen her unternommene erste Versuch einer Demokratie in Deutschland nach nicht einmal dreizehn Jahren in einer Katastrophe endet, die oktroyierte Demokratie der Siegermächte dagegen nahezu vorbehaltlos angenommen wird und eine erstaunliche Stabilität entwickelt“ (Mundt 1987, S. 293). Nicht zuletzt auch durch die im Versailler Vertrag festgelegten Reparationszahlungen an die Siegermächte waren die wirtschaftlichen Aussichten in der Weimarer Republik nach dem Ersten Weltkrieg in Deutschland mehr als schlecht; die Weltwirtschaftskrise infolge des Zusammenbruchs der New Yorker Börse 1929 tat ein übriges. Nach 1945 hat der nach dem damaligen US-Außenminister benannte Marshall-Plan (der offizielle Name dafür war *European Recovery Program*, ERP), an dem auch und gerade (West-) Deutschland partizipieren konnte, zum Wiederaufbau beigetragen und der Bonner Bundesrepublik eine wirtschaftliche Perspektive eröffnet, die sich bereits nach einem Jahrzehnt im „Deutschen Wirtschaftswunder“ manifestierte. Die durch die westlichen Siegermächte forcierte parallele Entwicklung demokratischer Strukturen, die mit der Formulierung des Grundgesetzes 1948/49 und der Gründung der Bundesrepublik Deutschland (BRD) im Mai 1949 ihren ersten Höhepunkt fand, schuf die Grundlage für die Verbindung von Demokratie und Wohlstand, Parlamentarismus und Perspektive. Zu dieser Perspektive gehört wesentlich auch soziale Sicherheit, d.h., die tragfähige Absicherung für die Wechselfälle des Lebens und das Alter, die den Wohlfahrtsstaat kennzeichnet. Ohne diesen Zusammenhang wäre dem demokratisch-parlamentarischen System der Bundesrepublik die dauerhafte Zustimmung versagt geblieben (vgl. u.a. Greiffenhagen 1997, S. 171 ff.).

Es ist deshalb sicherlich auch kein Zufall, daß sich der Massentourismus erst unter den politischen Rahmenbedingungen der ersten funktionierenden deutschen Demokratie entwickeln konnte. Auch wenn das Wort „Massentourismus“ für viele einen negativen Beigeschmack hat – es kennzeichnet eine Entwicklung, die man – begrifflich nicht ganz korrekt – auch als „Demokratisierung des Reisens“<sup>1</sup> bezeichnen kann: Sie hat breiteren Schichten

---

<sup>1</sup> Demokratie heißt, wörtlich aus dem Griechischen übersetzt, Volksherrschaft.

der Bevölkerung Reisemöglichkeiten eröffnet, die vorher nur privilegierten Gruppen vorbehalten waren.

Es ist interessant, daß der Massentourismus praktisch keine Rolle spielt, wenn es um die Untersuchung der Legitimität politischer Systeme geht. Das gilt auch für das bereits zitierte Buch von Martin Greiffenhagen (1997) über die „Politische Legitimität in Deutschland“. Dabei hat der legitimatorische Aspekt dieses Tourismus gerade in Deutschlands jüngster Geschichte eine sehr wichtige Rolle gespielt. Die Verhinderung der Reisefreiheit in der Deutschen Demokratischen Republik (DDR, 1949-1990), die im Bau der Berliner Mauer im August 1961 und in den Todesstreifen und Stacheldrahtzäunen der innerdeutschen Grenze ihren sichtbarsten Ausdruck fand, hat wesentlich zur andauernden Legitimationskrise dieses Staates beigetragen. Auch wenn er der eigenen Bevölkerung in Orwell'schem *newspeak* (Orwell 1949) als „antifaschistischer Wall“ gegen die Infiltration der westdeutschen „Revanchisten“ verkauft wurde, wußte doch jeder in Ost und West, was der wirkliche Grund für die Abschottung der Westgrenze war. Ein Staat, der seine Bürger mit Gewalt daran hindert zu verreisen, weil er befürchtet, daß einige von ihnen nicht wieder zurückkehren oder Informationen mit zurückbringen könnten, die seiner herrschenden Klasse nicht genehm sind, kann kaum auf Akzeptanz hoffen.

Die Verhinderung bzw. Einschränkung der Reisefreiheit ist ein Geburtsfehler marxistischer Systeme, wie nicht nur die Geschichte der Sowjetunion (UdSSR; 1922-1991) nach der Revolution von 1917 und ihren Vasallenstaaten zeigt, sondern heute noch Kuba und Nordkorea belegen. Schon weit vor der Gründung dieser Staaten hat Karl Peter Heinzen (1809-1880), in die USA emigrierter Aktivist der gescheiterten deutschen Revolution von 1848 und einer der Theoretiker des Terrorismus, in seinen gemäßigten späteren Jahren seinem Zeitgenossen Karl Marx (1818-1883) hellsichtig vorgeworfen, Kommunismus führe nur zu einer neuen Form der Sklaverei. In einem kommunistischen Amerika wäre es ihm nicht möglich, ohne amtliche Erlaubnis von seinem Wohnort Boston nach New York zu fahren, um dort eine Rede für den Kommunismus zu halten (Laqueur 2001, S. 13).

Viele Bürger der früheren DDR waren dennoch, bei aller Kritik im einzelnen, eigentlich mit ihren Lebensverhältnissen ganz zufrieden und wären gerne so frei gereist wie sie auch wieder zurückgekommen wären. Immerhin hatte, wenn auch nicht das Reisen, so doch das eng damit zusammenhängende Recht auf Urlaub in der DDR, anders als in der Bundesrepublik, Verfassungsrang (vgl. Mundt 2001, S. 93). Zumindest was Radio und Fernsehen anbetrifft, war die Informationsfreiheit ja weitgehend gegeben, denn nahezu jeder konnte die Westsender empfangen. Daß der Staat seinen Bürgern trotzdem die Reisefreiheit genommen hat, war langfristig ein ganz wesentlicher Beitrag zu seinem Niedergang.

Umgekehrt hat die früh garantierte Reisefreiheit im Westen Deutschlands erheblich zur Stabilität der Bundesrepublik beigetragen, nicht zuletzt auch deshalb, weil man das negative Beispiel des anderen Deutschland praktisch

vor der eigenen Haustür hatte. Allerdings wurde diese Freiheit von vielen im Westen Deutschlands schon Ende der 1950er Jahre als so selbstverständlich angesehen, daß sie ihren eigentlichen Wert schon gar nicht mehr begreifen konnten. Dies wird zum Beispiel deutlich in der Schilderung des in Berlin aufgewachsenen Literaturkritikers Marcel Reich-Ranicki, der nach Jahren nationalsozialistischer Verfolgung im Warschauer Ghetto und des Lebens unter ‚kommunistischer‘ Herrschaft in Polen 1958 endlich mit seiner Frau die deutsche Staatsangehörigkeit bekam:

„Die Sache endete günstig. Wir, Tosia und ich, wurden als Deutsche anerkannt. Einige Freunde hielten es für angebracht, uns ihr Beileid auszusprechen. Sie konnten gar nicht verstehen, daß wir glücklich waren, endlich Pässe zu haben, die unsere Existenz absicherten und die uns, wenn wir nur das Fahrgeld hatten, Reisen ins Ausland ermöglichten. Der Kritiker Willy Haas, der in der Weimarer Republik die ‚Literarische Welt‘ herausgegeben hatte, einige Jahre zuvor aus dem Exil aus Indien zurückgekehrt war und jetzt in Hamburg beinahe Denkmalschutz genießen durfte, fragte mich bekümmert, was mir an der Bundesrepublik denn eigentlich gefalle. Ich antwortete: *„Zunächst einmal: Daß man sie jederzeit verlassen kann.“* Haas war sprachlos. Denn er hatte nie in einem Staat gelebt, der seine Bürger wie Häftlinge behandelte“ (Reich-Ranicki 1999; cit. n. d. Ausg. 2000, S. 402 f.; Hervorh. J.W.M.).

Daß es jedem Bundesbürger frei gestellt war und ist, in welches Land er reisen möchte, hob die frühe Bundesrepublik sogar positiv von traditionellen Demokratien wie Großbritannien und die Vereinigten Staaten ab, in denen Länderverbote (wie Kuba für US-Bürger) und Devisenbeschränkungen (GB) die Wahlfreiheit der Destinationen länger einschränkte (wegen des ansteigenden Defizits in der Reisebilanz hatte die britische Regierung 1966 verfügt, daß die Bürger des Landes auf ihren Auslandsreisen maximal 60 £ ausgeben durften [Elliott 1997, S. 27]). Lediglich Einreiseverbote der Länder selbst konnten Bundesbürger objektiv von der Realisierung ihrer Reisewünsche abhalten. Durch das Wirtschaftswunder und die daraus resultierende harte Währung waren die Bundesbürger bald auch subjektiv in der Lage, ihre Sehnsucht nach ausländischen Reisezielen zu befriedigen.

Der hohe Stellenwert des Reisens in Deutschland sowohl in wirtschaftlicher als auch in sozialer Sicht wurde aber schon zu Zeiten der Weimarer Republik deutlich, als die Regierung zweimal, in den Jahren 1924 und 1931, vergeblich versuchte, Auslandsreisegebühren einzuführen. Immerhin ging es dabei 1924 um einen Betrag von 500 Goldmark, der so hoch war, daß sich kaum jemand noch eine solche Reise hätte leisten können.

„Die Reaktionen auf die Verordnungen zeigen, daß der Fremdenverkehr im Laufe der Weimarer Republik zu einem volkswirtschaftlichen Faktor geworden war, den die Regierung nicht mehr ignorieren konnte. ... Andererseits spielten soziale Aspekte eine Rolle, das heißt, das Reisebedürfnis derer, die nur in eng begrenztem Maß über Zeit und Geld zum Reisen verfügten“ (Keitz 1997, S. 67 f.).

Kurzum: Die Entwicklung der Reisechancen und damit des Tourismus ist in einem sehr starken Maße abhängig von Politik und wirtschaftlicher Ent-

wicklung, die mit der Politik wiederum sehr eng verzahnt ist. Insofern ist es nicht ganz nachzuvollziehen, wenn die politische Gestaltung dieses Lebensbereiches und Wirtschaftssektors zum Beispiel über die Setzung von entsprechenden Rahmenbedingungen oder von Fördermaßnahmen von vielen eher abgelehnt wird.

„Konservative bedauern, daß immer mehr Lebensbereiche **Gegenstand der Politik** werden. Dieses Bedauern könnte insbesondere für den Tourismus geltend gemacht werden. Er gilt als einer der letzten Bereiche, wo Freiheit in unserer Gesellschaft individuell erlebt werden kann“ (Keller 1999, S. 13; Hervorh. i. Orig.).

Gerade aber dadurch – und auch darauf weist Peter Keller hin –, daß die gesellschaftliche und wirtschaftliche Bedeutung des Tourismus in den letzten Jahrzehnten immer größer wurde, „ist es geradezu unvermeidlich, daß auch der Staat direkt und indirekt, regulierend und fördernd, mit dem Tourismus zu tun hat“ (a.a.O.). Es ist also fraglich, ob Tourismuspolitik wirklich, wie Richter (1989, S. 14) meint, eine sozusagen freiwillige Leistung der politischen Akteure ist (sie nennt es „*chosen policy*“), „die durch äußeren Druck einer unwilligen Regierung aufgezwungen wird“ (a.a.O.; Übers. J.W.M.).

Das eminent Politische des Tourismus wird auch deutlich, wenn man den Blick über die Grenzen Europas auf andere Exempel der Entwicklung des Reisens lenkt.

In China zum **Beispiel** hat das ‚kommunistische‘ Regime von 1949, dem Jahr des Sieges des „Langen Marsches“, bis 1978 den Tourismus rundheraus abgelehnt. Dafür waren mehrere Gründe maßgebend. Wie in allen totalitären Systemen wollten auch die chinesischen ‚Kommunisten‘ praktisch alle Lebensbereiche kontrollieren, um ihren Machtanspruch durchzusetzen. Mit der Entwicklung von Tourismus wäre aus ihrer Sicht das System gefährdet gewesen, denn ein Wachstum des Inlandstourismus hätte zu immer größeren Problemen der Überwachung der daraus resultierenden Kontakte geführt und die Chancen der Organisation gemeinsamer Interessen gegen das Regime gefördert. Alleine die durch das Reisen beförderte Diffusion von unliebsamen Informationen über die politische, soziale und wirtschaftliche Realität im Lande wird in solchen Staaten als systemgefährdend angesehen, in denen Nachrichten daher zensiert oder gleich ganz unterdrückt werden. Internationaler Tourismus hätte diese Gefahr noch verschärft, denn damit wären auch Informationen aus dem Ausland in das Reich der Mitte gedrungen. Deshalb wurde auch die Einreise nach China streng kontrolliert. Nur ausgewählten Ausländern wurde sie gestattet, denen man die besonderen Errungenschaften des chinesischen Weges zum Kommunismus in der Hoffnung zeigen wollte, daß die Berichte dieser Touristen das Bild Chinas im Ausland positiv beeinflussen würden. In den 25 Jahren zwischen 1954 und 1978 kamen so ganze 125.000 Besucher in das Land, die vom dafür extra gegründeten China International Travel Service betreut wurden. In den wenigen Hotels wurden nicht nur Ausländer, Auslandschinesen und Besucher aus den damaligen Kolonien Hongkong (britisch) und Macao (portugiesisch) strikt voneinander getrennt, sondern auch alle Kontakte zur Bevölkerung kontrolliert (Sofield & Li 1998, S. 369).

Vor diesem Hintergrund ist es wenig verwunderlich, daß die Chancen wirtschaftlicher Entwicklung durch den Tourismus über Jahrzehnte nicht wahrgenommen wurden. Zudem galten Dienstleistungen generell und der meist mittelständische Charakter touristischer Unternehmen wie des damit verbundenen Handwerks (zum Beispiel für die Herstellung von Mitbringseln) in der herrschenden Ideologie als rückständig und hatte Kollektivierung und industrieller Entwicklung zu weichen (a.a.O.). Die ‚kommunistische‘ Ideologie maoistischer Prägung maßte sich zudem die Erfindung eines neuen China an, das radikal mit allen Traditionen und der langen Geschichte des Landes bricht. In der ‚Kulturrevolution‘ der 1960er Jahre wurden deshalb viele Dokumente, Bilder, Denkmäler und Gebäude zerstört, die zum reichen kulturellen Erbe des Landes gehörten. Der Hinweis auf die vielfältigen Möglichkeiten des Landes zur Entwicklung von Kulturtourismus wären vor diesem Hintergrund wohl gnadenlos als Häresie verfolgt worden. Erst nach dem Tode Mao Tse-tungs 1976 kam es langsam zu einer Abkehr von der Bilderstürmerei und einer Öffnung des Landes, die nicht nur begleitet war von der Rückbesinnung auf eigene Traditionen, sondern auch von einer vorsichtigen Anerkennung der ethnischen Minderheiten des Landes und ihrer Kulturen. „Möglichkeiten der Entwicklung kulturellen Tourismus, die als einer der wichtigsten Wege zur Verbesserung des Lebensstandards angesehen werden, waren der Schlüssel zur Integration von Minderheiten in die übergreifende Tourismusedwicklung (*mainstream tourism development*)“ (So-field & Li 1998, S. 373; Übers. J.W.M.).

Auch in der Politikwissenschaft findet, wie generell in den Sozialwissenschaften, eine Beschäftigung und Auseinandersetzung mit dem Tourismus allenfalls am Rande statt. Bereits 1983 wunderte sich die us-amerikanische Politologin Linda K. Richter darüber, daß die politische Wissenschaft keinerlei Anstalten machte, die politischen Konsequenzen der globalen Reismuster des Tourismus zu untersuchen:

„Mit dem Tourismus beschäftigt man sich nicht bloß mit einem neuen Politikfeld wie Energie oder Umwelt, sondern mit einem Prozeß der politischen Sozialisation: eine mögliche Spezialisierung für politische Wissenschaftler; einem Phänomen, das mit Macht, ethischen und ideologischen Dimensionen zu tun hat und ein flexibles Mittel für die Ausübung nationalen und internationalen Einflusses darstellt. ... Tourismus hat politische Verzweigungen, welche die Hauptprobleme der meisten Unterdisziplinen der politischen Wissenschaft berühren.“ Dazu gehören „...*policy*-Analysen, ... vergleichende Politik, internationale Beziehungen, öffentliche Verwaltung und politische Theorie“ (Richter 1983, S. 316; Übers. J.W.M.).

Als ein neuerer Indikator für diesen Mangel mag die Behandlung des Tourismus in dem großen, in den 1990er Jahren erschienenen „Lexikon der Politik“ herangezogen werden. In diesen sieben Bänden mit zusammen 4279 Seiten taucht er praktisch nur in dem Artikel von Bendel über „Tourismus und Entwicklung“ auf, der in dem Band über „Die östlichen und südlichen Länder“ (Nohlen, Waldmann & Ziemer 1997) abgedruckt ist. Tourismus wird hier also implizit nur unter der Perspektive von Entwicklungsländern

abgehandelt. Im Band über „Die westlichen Länder“ (Schmidt 1992), die wirtschaftlich weit stärker entwickelt sind, taucht der Begriff, wie in den übrigen fünf Bänden, ausweislich des Sachregisters nicht einmal auf (bzw. es wird nur auf den Beitrag von Bendel verwiesen). Dabei sind es gerade die entwickelten Länder, in denen der Tourismus die weltweit größte Bedeutung hat und aufgrund ihres hohen wirtschaftlichen Entwicklungsstandes spielt auch der nationale Tourismus in ihnen, anders als in den weniger entwickelten Ländern, eine bedeutende Rolle (Richter 1983, S. 317).

Ebensowenig wird in dem Lexikon auch der Begriff ‚Tourismuspolitik‘ erwähnt, mit dem man sich zum Beispiel im angelsächsischen Raum schon seit längerem beschäftigt (zusammenfassend u.a. Hall 1994; Hall & Jenkins 1995) und den die OECD schon in den 1980er Jahren in ihren regelmäßigen Berichten über *Tourism Policy and International Tourism in OECD Countries* verwendete. Immerhin gibt es in einer ganzen Reihe von Ländern schon lange Tourismusministerien, die entsprechend auch Tourismuspolitik betreiben.

Die weitgehende Negierung dieses Bereiches in diesen Bänden setzt sich zudem fort bei der Behandlung internationaler Organisationen. Die Welttourismusorganisation (WTO) findet ebensowenig Erwähnung wie die der Internationalen Zivilluftfahrtorganisation (*International Civil Aviation Authority*, ICAO, einer Unterorganisation der Vereinten Nationen). Dafür werden im Band über „Internationale Beziehungen“ (Boeckh 1994) aber die ‚Internationale Bauxit-Vereinigung‘ und die ‚Union der Bananen ausführenden Länder‘ aufgeführt.

Entsprechend ist in diesem Werk leider auch der Bereich der Verkehrs-, insbesondere der Personenverkehrspolitik, einigermaßen unterbelichtet. Eine ausführlichere Behandlung findet nur in dem Band über „Die Europäische Union“ (Kohler-Koch & Woyke 1996) statt, in dem sehr knappe fünf Seiten dem Thema „Verkehrs- und Kommunikationspolitik“ (Göbel 1996) gewidmet sind. Ganz abgesehen davon, daß hier die Kommunikationspolitik, die mit der Telekommunikation eine der globalen Zukunftsindustrien betrifft, hier eher erwähnt als analysiert und abgehandelt wird, bleibt auch die Darstellung der Verkehrspolitik nur sehr rudimentär und eher auf der Ebene von Stichworten. Vor dem Hintergrund der wirtschaftlichen und damit auch der politischen Bedeutung des Tourismus und der mit ihm verbundenen Sektoren, insbesondere des Verkehrswesens und der Verkehrsindustrie, ist dies einigermaßen verblüffend.

Zu einer kleinen Ehrenrettung der Politikwissenschaft in diesem Zusammenhang muß aber angefügt werden, daß im Fischer-Lexikon „Außenpolitik“ von 1958 der Luftverkehr ein eigenes Hauptstichwort bekommen hat, das auf immerhin knapp drei Seiten den damaligen Stand recht detailliert wiedergibt. Sehr zu Recht stellen die Autoren fest: „Die technische Möglichkeit der Luftfahrt hat die internationalen Beziehungen im Krieg wie im Frieden erheblich verändert“ (Mann & Pross 1958 b, S. 169). Allerdings handelt es sich bei den beiden Herausgebern und Autoren nicht um Politologen: Golo Mann war Historiker und Harry Pross Publizist.

Daß die wirtschaftliche und gesellschaftliche Bedeutung des Tourismus häufig unterschätzt wird, hängt auch damit zusammen, daß im **Alltagsverständnis** Tourismus auf die in der Freizeit gemachten Reisen und dort auch wieder nur auf Urlaubsreisen reduziert wird. Nach der gemeinsamen Definition der Vereinten Nationen (UNO) und der Welttourismusorganisation (WTO) aus dem Jahre 1994 werden dem Tourismus jedoch prinzipiell alle Reisen mit einer Aufenthaltsdauer von mindestens zwei Tagen (eine Übernachtung) und maximal einem Jahr (364 Übernachtungen) zugerechnet. Ausgenommen sind lediglich Saisonarbeiter, Auswanderer, Nomaden, Flüchtlinge, Transitpassagiere, Armeeangehörige, Konsultatsmitglieder und Diplomaten (UN & WTO 1994). Mit anderen Worten: Dienst- und Geschäftsreisen sind dem Tourismus ebenso zuzurechnen wie der Besuch von Verwandten und Bekannten. Dies hat auch schon deshalb Sinn, weil die griechisch/lateinische Herkunft der Begriffe ‚Tourist‘ und ‚Tourismus‘ auf die Zirkelbewegung als Grundmuster aller touristischen Reisen hinweisen (vgl. Mundt 2001, S. 1 ff.): Man verläßt seinen räumlichen Lebensmittelpunkt, um für eine vergleichsweise kurze Zeit an mindestens einem anderen Ort zu verweilen, wobei der Zeitpunkt der Rückkehr in der Regel bereits vorher feststeht. Der **Fachbegriff ‚Tourismus‘** umfaßt also einen erheblich größeren Bereich als seine alltagssprachliche Verwendung. Die Weite des Fachbegriffes ist schon deshalb sinnvoll, weil zum Beispiel Geschäfts- und Freizeitreisende sehr oft die gleiche Verkehrsinfrastruktur und die gleichen Betriebe des Gastgewerbes in Anspruch nehmen wie Freizeit- und Urlaubsreisende. Dies muß man im Auge behalten, wenn es im Folgenden um die Beschreibung und Analyse von Tourismuspolitik geht.

Immerhin ist der Tourismus eine der größten globalen Industrien und der Auslöser für eine Vielzahl von Investitionen und Ausgaben für Sachgüter, die jedoch aufgrund der angebotsorientierten Darstellung von Wirtschaftszweigen meist anderen Sektoren zugerechnet werden, denn die

„meisten Länder (verfügen) nach wie vor über wenig verlässliche Informationen über die wichtigsten Bereiche des Tourismus (*travel and tourism*), weil die Regierungen immer noch nicht die Notwendigkeit der Messung von Nachfrage sehen. Die ‚Tourismus‘-Daten zum Beispiel, die in den Berichten von WTO, WTTC, OECD und EU veröffentlicht werden, werden gewöhnlich als zusammengefaßte Summe aller Tourismusarten präsentiert. Bei den meisten der Daten handelt es sich um grobe Schätzungen, die aufgrund unterschiedlicher Methoden erfaßt und zusammengetragen werden“ (Middleton 1998 b, S. 66; Übers. J.W.M).

Der Bericht des Büros für Technikfolgenabschätzung des Deutschen Bundestages von Petermann *et al.* (1998, S. 34) unterstreicht diese Feststellung am Beispiel der Bundesrepublik Deutschland noch einmal sehr deutlich. Die Angaben über die Nettoreiseintensität der Deutschen bei den längeren Urlaubsreisen schwanken zwischen 54 Prozent (BAT-Freizeitforschungsinstitut) und 78 Prozent (Reiseanalyse der Forschungsgruppe Urlaub + Reisen, F.U.R.) für 1996, die Angaben zu Übernachtungen von Ausländern in Deutschland liegen für 1993 zwischen 60 Millionen – berechnet aus den

Angaben amtlicher Statistik – und 150 Millionen, die durch die Repräsentativerhebungen (allerdings auch zum Teil mit verschiedenen Methoden) in mehr als 20 Ländern ermittelt wurden. Letzteres ist eine Differenz von 250 Prozent!

Das Verhältnis vieler Politiker zu Statistiken erscheint generell als ziemlich gespalten. Auf der einen Seite wird gerne und ausführlich aus statistischem Material zum Beleg dieses oder jenen Argumentes gearbeitet, auf der anderen Seite versucht man aber, die Statistiker möglichst kurz zu halten. Zum Teil, weil man glaubt, die Unternehmen bzw. die Bevölkerung nicht mit zu viel Nebenaufgaben belasten zu können, zum Teil aber wohl auch deshalb, weil man im Ungefähren weit interpretierbarer Zahlen viel besser Interessenpolitik betreiben kann als vor dem Hintergrund klarer Fakten und Zahlen.

Andererseits gibt es aber sehr ausführliche Statistiken in einem Bereich, der volkswirtschaftlich schon lange seine ursprüngliche Bedeutung verloren hat: in der Landwirtschaft nämlich. Das hat natürlich auch historische Gründe, denn der Ursprung der amtlichen Statistik liegt in der Landwirtschaftsstatistik, die der absolutistische Zentralstaat für die Durchsetzung seines Machtanspruches und die Herauslösung von Teilen der Bevölkerung aus der Produktion benötigte, so zum Beispiel zur Ermöglichung von stehenden Heeren. Aber das alleine kann nicht dafür verantwortlich sein, daß wir Jahrhunderte später noch immer so tun, als wäre die Landwirtschaft die wichtigste Einkommensquelle einer Nation. Was der Bildungsforscher Hansgert Peisert vor mehr als drei Jahrzehnten für die Bildungsstatistik festgestellt hat, gilt daher in weiten Teilen – hier bezogen auf Tourismusstatistiken – auch heute noch:

„Immer noch sind wir hier auf Schätzungen und die Ergebnisse monographischer Einzeluntersuchungen angewiesen, während wir uns mit einem Griff zum Statistischen Jahrbuch der Bundesrepublik beispielsweise über die Entwicklung der ‚Schnittblumenfläche für Edelnelken im Zierpflanzenunterglasanbau‘ sehr genau orientieren können“ (Peisert 1967, S. 66).

Zwar wird diese Statistik heute dort nicht mehr veröffentlicht, dafür wissen wir aber aus dem Statistischen Jahrbuch 2002, wie groß die „Ernteerträge bei Silomais einschließlich Lieschkolbenschrot gemessen in Grünmasse“ nach Bundesländern ausgefallen sind. Wie wenig modern die amtliche Statistik in diesem Punkt heute noch ist, zeigt sich auch darin, daß dem Tourismus, der in Deutschland ca. acht Prozent der Erwerbstätigen beschäftigt, nur zehn Seiten eingeräumt werden, die Landwirtschaft jedoch 40 Seiten beansprucht, obwohl sie nur noch drei Prozent der Beschäftigten stellt. Allerdings wird der Tourismus jetzt stärker, die Landwirtschaft weniger berücksichtigt, denn im Statistischen Jahrbuch 1998 waren dem Tourismus erst acht und der Landwirtschaft noch 47 Seiten gewidmet. So müssen wir bei weiterer Lektüre des Statistischen Jahrbuchs 2002 nunmehr mit Bedau-



Landtagswahlen geben, wo der Tourismus ein sichtbar dominierender oder bedeutender Wirtschafts- und Beschäftigungsfaktor ist, *grosso modo* ist Tourismuspolitik für die meisten Menschen so interessant wie Fragen des Länderfinanzausgleiches oder der Bundesbeteiligung an Hochschulneubauten.

Tourismus ist aber von wesentlicher Bedeutung nicht nur für die wirtschaftliche Entwicklung vieler Länder und Regionen, sondern hat auch einen nachhaltigen Einfluß auf die Qualität von Umwelt und Kultur sowohl in den besuchten Destinationen als auch in den Ländern und Regionen, aus denen die Reisenden kommen. Die wenigsten sind sich klar darüber, daß auch sogenannte *high tech*-Industrien wie etwa die Computer- und Softwareindustrien zu einem nicht geringen Teil abhängig von der touristischen Nachfrage sind, die über mittlerweile auch globale Reservierungssysteme abgewickelt wird. Noch größer ist die Abhängigkeit der mit den vorgenannten Unternehmen eng verknüpften Luftfahrtindustrie, deren ziviler Teil zum weitaus größten Teil für die Befriedigung touristischer Nachfrage tätig ist.

Ambivalent dagegen ist der Einfluß des Tourismus auf die Umwelt. Auf der einen Seite können viele Natur- und Kulturlandschaften alleine durch ihre touristische Nutzung erhalten werden, sind viele Umweltschutzmaßnahmen an den Küsten aus der Furcht heraus entstanden, ohne sie wesentliche Teile ihrer touristischen Nachfrage zu verlieren, auf der anderen Seite aber trägt der Tourismus unter vielen Aspekten auch zu einer Verschlechterung von Umweltqualität bei. Der Verbau von Küstenregionen, die Zerstörung von Naturräumen durch Verkehrsinfrastruktur und die globalen Auswirkungen der Abgase touristisch genutzter Verkehrsmittel von Automobilen bis zu Flugzeugen addieren sich zu einer negativen Umweltbilanz. Die gleiche Ambivalenz verspüren viele Menschen auch hinsichtlich der kulturellen Auswirkungen des Tourismus. Zwar wurden auf der einen Seite vielfach lokale und regionale Baustile, Sitten und Gebräuche durch den Tourismus erhalten, die sonst längst einer einförmigen Modernisierung zu Opfer gefallen wären, auf der anderen Seite haben sie sich aber nicht selten zu nachfragegerechten Instant-Versionen der Originale entwickelt, über deren kulturellen Wert man durchaus geteilter Meinung sein darf. Manchmal auch sieht man den Tourismus als das Einfallstor, durch das die Moderne in traditionelle Gesellschaftsräume einfällt und alte, in langer Zeit gewachsene Strukturen in sehr kurzer Zeit aufbricht, um an ihre Stelle eine austauschbar erscheinende Melange aus Versatzstücken moderner westlicher Konsumkultur mit den marginalen Resten einer einst funktionsfähigen eigenständigen Kultur und gesellschaftlichen Identität zu setzen.

Unabhängig davon, was von diesen Eindrücken eher nostalgische Verklärung als Realität ist, zeigt schon das bloße Vorhandensein solcher Reaktionen und Sichtweisen die Breite der politischen Fragen und Probleme auf, die Folge der Entwicklung des Tourismus sein können. Tourismuspolitik umreißt also einen die wirtschaftliche Sphäre weit übergreifenden Wir-

kungskreis politischen Handelns, wie dies bereits auf Seite 10 deutlich geworden ist. Entsprechend kann man sie sehr allgemein wie folgt fassen:

**Definition:** Tourismuspolitik ist die Summe aller Maßnahmen öffentlicher Institutionen auf allen Ebenen politischen Handelns, die direkt oder indirekt, bewußt oder unbewußt, die Gestaltung und Entwicklung des Tourismus bestimmen.

Tourismuspolitik wird ja nicht nur auf nationaler Ebene, sondern vor allem – besonders in föderalistisch verfaßten politischen Systemen – auf regionaler und schließlich auch auf lokaler bzw. kommunaler Ebene betrieben. Die Unterscheidung zwischen direkter und indirekter Tourismuspolitik geht zurück auf Krippendorf (1976; cit. n. Müller, B. Kramer & Krippendorf 1995, S. 155).

- **Direkte Tourismuspolitik** beinhaltet danach alle Maßnahmen, die „hauptsächlich oder ausschließlich aus dem Tourismus heraus begründet werden“ oder sich unmittelbar auf ihn beziehen;
- **indirekte Tourismuspolitik** umfaßt dagegen alle diejenigen Maßnahmen, „die nicht in erster Linie den Tourismus zum Gegenstand haben, diesen aber ... als Wirtschaftszweig maßgeblich tangieren“ (a.a.O.).

Die Beschränkung des Tourismus auf einen Wirtschaftszweig – wo immer seine Grenzen gezogen sein mögen – ist hier allerdings eine Verengung der Sichtweise des Tourismus und von den auf ihn einwirkenden Faktoren aus der Sphäre des politischen Handelns. Auch die Bildungs- und die Kulturpolitik zum Beispiel haben einen erheblichen Einfluß auf die Formation touristischen Verhaltens, auf die Qualität des touristischen Erlebens und auf das Verhältnis zwischen Tourismus und Gesellschaft sowohl in den Entsende- wie in den Empfängerländern und -regionen.

Vielfach ist den politischen Akteuren auch gar nicht bewußt, daß sie mit bestimmten Entscheidungen in den Tourismus eingreifen und damit auch – manchmal sogar sehr massiv – Tourismuspolitik betreiben.

Das prominenteste **Beispiel** dafür ist die Kultusministerkonferenz (KMK), in der die zuständigen Minister der Bundesländer in Deutschland die Schulferientermin abstimmen und beschließen. Weil Nordrhein-Westfalen auf einen späteren Termin für den Beginn seiner Sommerferien drängte, hatten die bevölkerungsreichsten Länder Nordrhein-Westfalen, Bayern und Baden-Württemberg ab 2003 zusammen Ferien. Gleichzeitig wurde mit diesem Beschluß der Gesamtzeitraum der Großen Ferien von ca. 90 auf ca. 70 Tage verkürzt. Damit verringerte sich die Hochsaison in den von deutschen Touristen besuchten Zielgebieten im In- und Ausland um mehr als 20 Prozent. Die Folge waren leere Betten zu Beginn der Sommersaison und Übernachtungsfrage gegen Ende. Damit wurden nicht nur die Wahlmöglichkeiten von Familien mit schulpflichtigen Kindern stark eingeschränkt, sondern der Tourismuswirtschaft entgingen dadurch auch Umsätze in Milliardenhöhe. Unter massivem öffentlichem Druck sah sich die KMK daher im Juni 2003 gezwungen, ihre

gerade erst beschlossene langfristige Ferienplanung wieder zu revidieren, so daß ab 2005 die Gesamtzahl der Sommerferientage wieder auf durchschnittlich über 80 Tage steigt. Die früheren 90 Tage sollen aber erst nach 2010 wieder erreicht werden, so daß Familien und Tourismuswirtschaft noch einige Jahre mit den daraus resultierenden Problemen leben müssen.

Der in diesem Buch immer wieder versuchte Blick auf andere Länder, andere politische Systeme, ihre Akteure und Politiken, ist nicht unproblematisch, weder bei der Darstellung positiver noch bei der Betrachtung negativer Beispiele. Oberflächliches Hinsehen, und um viel mehr kann es in diesem Zusammenhang dabei nicht gehen, beschert dem außenstehenden Beobachter nicht selten schnelle Erkenntnisse, die sich leicht in die eigenen Auffassungen von politischen Zielen und insbesondere Inhalten und Maßnahmen einfügen. Die nur in groben Umrissen deutlich werdenden politischen Linien werden oft mehr unbewußt als absichtlich ergänzt durch eigene Ideen und Vorstellungen. Unterbrochene Linien werden zu logisch erscheinenden Konturen vervollständigt, die das Gefühl vermitteln, sich ein stimmiges Bild von den gesellschaftlichen Verhältnissen und der Politik in anderen Ländern machen zu können. Dies liegt ebenso im Charakter der menschlichen Wahrnehmung wie etwa die Nutzung der weitgehend unbeschriebenen Areale zwischen den Linien als Projektionsfläche für als positiv empfundene eigene Ideen und Entwürfe. Kontrastiert mit den oft sehr kleinen Karos, in denen man die Politik des eigenen Landes mehr verharren als sich bewegen sieht, erscheinen die wahrgenommenen politischen Konzepte in anderen Ländern nicht selten als mögliches Modell für notwendige Reformen, die zudem den Vorzug haben, sich bereits in der Praxis bewährt zu haben. Den aus solchen Vergleichen gezogenen Schlußfolgerungen haftet damit zumindest in Teilen etwas Illusorisches an. Das gilt nicht nur deshalb, weil einiges davon eher in der Projektion des positiven Selbst als in den realen Verhältnissen der betrachteten Länder zu finden ist, sondern auch, weil die Voraussetzungen und oft harzigen Strukturen des heimischen politischen Systems bei der Vorstellung solcher empirischer Beispiele ausgeblendet werden (können). Dabei ist das Gefüge der politischen Entscheidungswege in den betrachteten Ländern meist nicht weniger verkrustet als im eigenen, nur eben vielleicht in anderen Bereichen und auf andere, auf den ersten Blick wahrscheinlich nicht gleich deutlich werdende Weise.

Nicht ohne Reiz ist aber auch der umgekehrte Gedanke, daß nämlich der Blick des Außenstehenden quasi aus einer räumlichen und sozialen Entfernung erfolgt, die ihm einen besseren Überblick erlaubt über die Strukturen und Zusammenhänge als dem in der politischen Alltagswirklichkeit des Landes Verhafteten, der Gefahr läuft, im Dickicht der Details die großen Linien nicht mehr wahrnehmen zu können. Die Stichhaltigkeit dieses Arguments wird immer wieder aufs Neue belegt durch die Erfahrung, daß erst die historische Besichtigung von Zeitabschnitten Zusammenhänge erkennen läßt, die den Zeitgenossen weitgehend verborgen blieben. Oft bedarf es auch der zeitlichen Distanz, um überhaupt den Versuch einer vorurteilsfreien Be-

trachtung und Analyse von politischen Handlungskomplexen zu ermöglichen, da die daran Beteiligten ein Interesse daran haben (müssen), ihre Taten zu rechtfertigen und/oder Teile der Realität auszublenden, die zumindest rückblickend eher fragwürdiger Natur waren.

Es ist deshalb immer wieder wichtig und interessant, nicht nur auf andere zu schauen, sondern auch die eigenen Verhältnisse aus dem Blickwinkel anderer gespiegelt zu bekommen. Dies wird zwar im vorliegenden Buch nicht durchgängig, sondern allenfalls punktuell zu leisten sein, macht aber deutlich, daß erst dieses Spiel wechselnder Perspektiven die Verhältnisse zumindest intellektuell ein wenig zum Tanzen bringen kann, indem man die Versatzstücke von Systemen unbeeindruckt von ihren historischen und strukturellen Bedingungen und Einschränkungen wie in einem Kaleidoskop zu immer neuen Mustern ordnen kann, die Denkblockaden lösen und zur Diskussion über Lösungsmöglichkeiten politischer und gesellschaftlicher Probleme beitragen können. Dabei ist es möglicherweise gerade die beschriebene Auslösung von Assoziationen und Projektionen, die das Denken beflügelt und sich zu neuen Konzepten verdichten läßt. Überspitzt formuliert kann man hier manchmal von einer Produktivität des Mißverständnisses sprechen, denn ohne sie käme es in manchen Bereichen möglicherweise gar nicht zu Innovationen.

Ein aktuelles **Beispiel** aus dem Bildungsbereich dafür ist die Einführung von Bachelor Abschlüssen im europäischen Hochschulwesen, die auch Tourismusstudiengänge betrifft. Ursprünglich waren diese Abschlüsse in England irgendwo zwischen dem deutschen Abitur und einer universitären Zwischenprüfung angesiedelt (in Schottland ist der erste Abschluß weitgehend dem deutschen System entsprechend der M.A.). Deshalb hatten sie meist eher allgemeinbildende Funktionen. Vor dem Hintergrund der hohen Anteile von Studenten, die Universitäten in Deutschland ohne Abschluß verlassen (müssen) und vor allem durch das von der EU geförderte Erasmus- bzw. Sokrates-Studentenaustauschprogramm wird die Notwendigkeit eines frühen Abschlusses gesehen, der mit denen der anderen europäischen Ländern und denen der USA harmoniert. Im Vordergrund dabei stehen jetzt aber – entgegen dem ursprünglichen Modell – in erster Linie berufsqualifizierende, nicht allgemeinbildende Inhalte. Damit nehmen auch die deutschen Universitäten, die sich bis dato eher der reinen Wissenschaft verpflichtet fühlten, die Verwertungsrealität ihrer Studiengänge endlich auch offiziell wahr.

Der Blick über die Grenzen führt, wie in diesem Beispiel, meist also nicht zu bloßen Kopien des dort Wahrgenommenen, sondern zu etwas Neuem, zu dem das Gesehene den Anstoß gab. Gleichzeitig muß man, und auch das zeigt dieses Beispiel, davon ausgehen, daß die jenseits der eigenen Grenzen betrachteten Modelle einem Wandel unterliegen, der nicht zuletzt wieder durch Rückwirkungen der in andere Länder übertragenen Lösungsmuster auf die ursprünglich betrachteten Modelle ausgelöst wird. Nicht vergessen darf man zudem das alte Sprichwort, nachdem der Prophet im eigenen Lande nichts gilt. Gute Ideen lassen sich deshalb häufig nur dadurch ‚verkaufen‘

und nachhaltig durchsetzen, indem man gleichsam über die Bande spielt und auf erfolgreiche ausländische Ansätze und Anwendungen verweist.

Ein **Beispiel** dafür zeigt sich in der Übernahme und Weiterentwicklung us-amerikanischer Konzepte des Qualitätsmanagements im Nachkriegsjapan. Sie wurden von japanischen Managern und Wissenschaftlern entscheidend weiterentwickelt und erfolgreich in die unternehmerische Praxis umgesetzt. Gleichwohl ist der japanische Qualitätspreis nach dem US-Amerikaner Walter Edwards Deming benannt, der nach dem Ende des Zweiten Weltkriegs im Dienste der US-Besatzungsmacht beim Wiederaufbau Japans half. „Die Japaner neigen im übrigen dazu, ausländische Persönlichkeiten für ihre eigenen Erfolge auszuzeichnen“ stellt Hans-Dieter Zollondz (2002, S. 84) dazu fest.

Diese verschiedenen Aspekte und auch die teilweise damit verbundenen Warnungen sind im Auge zu behalten, wenn in den folgenden Kapiteln immer wieder einmal auf tourismuspolitische Konzepte und Beispiele aus anderen Ländern verwiesen wird. Bevor wir uns aber im einzelnen näher mit den Bereichen, Zielen, Maßnahmen und Methoden von Tourismuspoltik beschäftigen, müssen wir wieder einen Schritt zurückgehen und uns zunächst über den Politikbegriff verständigen.
